# Supplementary material
Source: publisher figshare collection journal article supplement (https://acs.figshare.com/ndownloader/files/3859207)
Supplement: Supplementary file 1 [file 3859207]

## Supplementary Information

# Optimizing Performance of Silicon-Based pn Junction Photodetector by Piezo-Phototronic Effect

Zhaona Wang<sup>1, 2, #</sup>, Ruomeng Yu<sup>1, #</sup>, Xiaonan Wen<sup>1, #</sup>, Ying Liu<sup>1</sup>, Caofeng Pan<sup>3</sup>, Wenzhuo Wu<sup>1</sup>, Zhong Lin Wang<sup>1, 3, \*</sup>

<sup>1</sup>School of Materials Science and Engineering, Georgia Institute of Technology, Atlanta, Georgia 30332-0245, USA

<sup>2</sup>Department of Physics, Beijing Normal University, Beijing, China, 100875

<sup>3</sup>Beijing Institute of Nanoenergy and Nanosystems, Chinese Academy of Sciences, Beijing, China, 100083

\*Email: [zhong.wang@mse.gatech.edu](mailto:zhong.wang@mse.gatech.edu)

<sup>#</sup>These authors contributed equally to this work

## ***I*-strain characteristics and detectivity $D^*$ of the p-Si/n-ZnO NWs hybridized photodetector**

*I*-strain characteristics of p-Si/n-ZnO NWs hybridized visible PDs under a series of incident light power densities and external strain conditions are investigated and summarized in Figure S1a under 442 nm illuminations and 2 V forward bias voltage. The response of output currents to different strains show a monotonous increase with externally applied strains for each power density. Also, the overall signal levels increase significantly by applying light stimuli with stronger power density, because more photon-induced electron-hole pairs are generated.

As shown in Figure S1b, the detectivity  $D^*$  is calculated under different incident light intensities and strain conditions as  $D^* = R / (2e \cdot I_{dark,s} / S)^{0.5}$ , where  $I_{dark,s}$  is the dark current under the corresponding external strain (considered as the major noise),  $S$  is the effective surface area of PD<sup>1</sup>. Experimental results indicate that a maximum value is observed at -0.1‰ compressive strain for the detectivity  $D^*$  under each

illumination power density, with the highest value of  $7.1 \times 10^9$  Jones under the power density of  $3.2 \times 10^{-5} \text{ W/cm}^2$ .

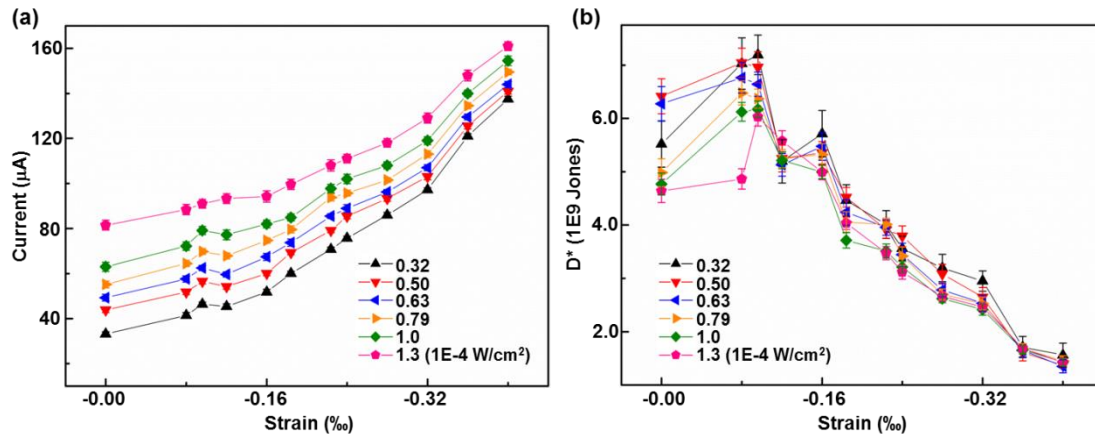

**Figure S1.** Piezo-phototronic effect on (a) the output current and (b) the detectivity  $D^*$  of p-Si/n-ZnO NWs hybridized PDs under a series of power densities and external strain conditions.

1. Liu, X.; Gu, L. L.; Zhang, Q. P.; Wu, J. Y.; Long, Y. Z.; Fan, Z. Y. All-Printable Band-Edge Modulated ZnO Nanowire Photodetectors with Ultra-High Detectivity. *Nat Commun* 2014, 5, 4007.
